1

2 **Modulation of metabolic hormone signaling *via* a circadian hormone and a**  
3 **biogenic amine in *Drosophila melanogaster*.**

4

5 Jason T. Braco<sup>1,\*</sup>, Cecil J. Saunders<sup>1</sup>, Jonathan M. Nelson<sup>1</sup>, and Erik C. Johnson<sup>1,2,#</sup>

6

7 <sup>1</sup>Department of Biology, Wake Forest University, Winston-Salem, NC 27109

8 <sup>2</sup>Center of Molecular Communication and Cell Signaling, Wake Forest University, Winston-  
9 Salem, NC

10 # Corresponding Author: [johnsoec@wfu.edu](mailto:johnsoec@wfu.edu)

11

## 12 **ABSTRACT**

13           In insects, Adipokinetic hormone is the primary hormone responsible for the mobilization  
14 of stored energy. While a growing body of evidence has solidified AKH's role in modulating the  
15 physiological and behavioral responses to metabolic stress, little is known about the upstream  
16 endocrine circuit that directly regulates AKH release. We evaluated the AKH-expressing cell  
17 transcriptome to identify potential regulatory elements controlling AKH cell activity, and found  
18 that a number of receptors show consistent expression levels, including all known dopamine  
19 receptors, dopamine ecdysone receptor (DopEcR), Dopamine 2-like receptor (D2R), Dopamine  
20 1-like receptor 2 (DopR2), DopR, and the Pigment Dispersing Factor (PDFR). We tested the  
21 consequences of targeted genetic knockdown and found that RNAi elements targeting each  
22 dopamine receptor caused a significant reduction in survival under starvation. In contrast, PDFR  
23 knockdown significantly extended lifespan under starvation whereas expression of a tethered PDF  
24 in AKH cells resulted in a significantly shorter lifespan during starvation. These manipulations  
25 also caused various changes in locomotor activity under starvation. Specifically, there were higher  
26 amounts of locomotor activity in dopamine receptor knockdowns, in both replete and starved states.  
27 PDFR knockdown resulted in increased locomotion during replete conditions and locomotion  
28 levels that were comparable to wild-type during starvation. Expression of a membrane-tethered  
29 PDF led to decreased locomotion under baseline and starvation. Next, we used live-cell imaging  
30 to evaluate the acute effects of the ligands for these receptors (dopamine, ecdysone, and Pigment  
31 Dispersing Factor) on AKH cell activation. Dopamine application led to a transient increase in  
32 intracellular calcium in a sugar-dependent manner. Furthermore, we found that co-application of  
33 dopamine and ecdysone led to a complete loss of this response, suggesting that these two hormones  
34 are acting antagonistically. We also found that PDF application directly led to an increase in cAMP

35 in AKH cells, and that this response was dependent on expression of the PDFR in AKH cells.  
36 Together these results suggest a complex circuit in which multiple hormones act on AKH cells to  
37 modulate metabolic state.

38

39 **AUTHOR STATEMENT:**

40 **The precise mechanisms of energy allocation in organisms is not completely understood. In**  
41 **Drosophila, the Adipokinetic Hormone which is the functional equivalent of mammalian**  
42 **glucagon features prominently in mediating behavioral and physiological changes**  
43 **accompanying nutrient limitation. In this study, we examine the AKH cell specific**  
44 **transcriptome and find multiple receptor molecules expressed in this cell type. We find that**  
45 **the circadian hormone, Pigment Dispersing Factor and the biogenic amine, dopamine, alter**  
46 **AKH cell physiology and suggest a complex endocrine circuit that modulate basic**  
47 **metabolism.**

## 48 **Introduction**

49           Throughout the Metazoa, metabolic homeostasis is coordinated by a number of different  
50 hormones that coordinate between storage and release of energy. In *Drosophila*, insulin-like  
51 peptides (dILPS) and Adipokinetic hormone (AKH), modulate energy storage and release,  
52 respectively (Kim and Rulifson 2004; Leopold and Perrimon 2007). The cells that express these  
53 hormones represent important points of integration that couple changes in metabolic allocation  
54 towards different behaviors and/or physiologies (e.g., reproduction or growth). While many studies  
55 have focused on the regulation of the dILPS (e.g., Toivonen and Partridge 2009; Birse *et al.* 2011;  
56 Kannan and Fridell 2013), there has been comparatively little research identifying elements that  
57 regulate the synthesis, release, and signaling of AKH.

58           Genetic ablation of AKH producing cells (APCs) (Lee *et al.* 2004; Braco *et al.* 2012),  
59 blockade of AKH hormone release (Braco *et al.* 2012), or the loss of the AKH or the AKH receptor  
60 gene (AKHR) (Galilkova *et al.*, 2011, Yu, Huang, Ye, Zhang, Wang, *et al.* 2016), all produce  
61 consistent metabolic and behavioral phenotypes. Specifically, these manipulations cause an  
62 increase in triglyceride content, and reduce levels of circulating trehalose (Lee *et al.* 2004; Isabel  
63 *et al.* 2005). The AKHR, which binds AKH with high affinity, is expressed at high levels in the  
64 fat body and genetic knockdown of AKHR in this tissue produces many of the same metabolic  
65 phenotypes associated with the loss of the AKH hormone (Grönke *et al.* 2007; Bharucha *et al.*  
66 2008). In animals, a common behavioral response to nutrient depletion is increased locomotion  
67 (Scheurink *et al.* 2010; Mistlberger 2011). This may seem counterintuitive as hyperactivity during  
68 nutrient limitation would exacerbate energy depletion, however, it is hypothesized that starvation-  
69 induced activity is an adaptive trait that facilitates foraging (Johnson 2017). Interestingly, animals  
70 lacking AKH show no changes in locomotor activity under starvation conditions (Lee *et al.* 2004).

71 Consequently, AKH mutants have increased lifespan under starvation, presumably caused by the  
72 lack of starvation-induced hyperactivity and elevated levels of energy stores (Lee *et al.* 2004).

73 Despite our growing understanding of AKH signaling, little is known about the factors that  
74 govern AKH release. Currently, only two mechanisms are known which detect changes in  
75 intracellular energy in this cell lineage. AKH cells express two energy sensors:  $K^+_{ATP}$  channels  
76 and AMPK (Kim and Rulifson 2004; Braco *et al.* 2012). These molecules couple to changes in  
77 cellular ATP with electrical excitability and AKH release (Stephan *et al.* 2006). While these two  
78 molecules are critical factors modulating AKH release, they are unlikely to be the sole mechanisms.  
79 Recent work has shown that the loss of AMPK only partially phenocopies the loss of AKH,  
80 suggesting alternative or additional mechanisms controlling AKH secretion (Braco *et al.* 2012).

81 Studies in other insects implicate a number of diverse hormones are modulating AKH  
82 release. Crustacean cardioacceleratory peptide (CCAP), tachykinin (TK), and octopamine are  
83 positive regulators of AKH release and FLRFamide and FMRFamide act to inhibit AKH release  
84 in the locust (Pannabecker and Orchard 1986; Brown and Lea 1988; Veelaert *et al.* 1997; Vullings  
85 *et al.* 1998). In general, these experiments measured AKH titer in entire CNS preparations or whole  
86 organism in response to hormone application, thus making it impossible to assert whether these  
87 hormones are acting directly to alter AKH release or if they are acting through some intermediate  
88 (Pannabecker and Orchard 1986; Brown and Lea 1988).

89 Here, we report the identification of the complement of peptide and amine receptors  
90 expressed in the AKH cell lineage employing single cell RNA sequencing methods. We further  
91 assessed the functional contributions of the PDF receptor, and all known dopamine receptors with  
92 specific regards to modulation of AKH cell physiology. Genetic knockdown of these receptors

93 in AKH cells, caused changes in starvation survival and to locomotor activity. We further validated  
94 these by directly testing for changes in AKH cell physiology using live-cell imaging of explanted  
95 AKH cells. We found that these hormones evoked specific changes in fluorescent reporters in  
96 AKH cells. These results not only implicate novel functions for some of these hormones but also  
97 provide a better understanding of how multiple signals converge on AKH cells to modulate  
98 changes in organismal physiology.

99

100 **RESULTS:**

101 *AKH cells express multiple receptor molecules:*

102 To gain insight into potential regulatory elements governing AKH release, we evaluated  
103 the transcriptome of AKH cells. Individual AKH cells were identified by introducing a GFP  
104 reporter prior to microdissection and RNA sequencing. The transcriptome was assessed from 5  
105 replicate individuals each that had experienced 24 hours of starvation and compared to animals  
106 that were fed *ad libitum*. An initial analysis of the RNA sequencing of 13 billion nucleotides  
107 corresponding to 11,456 transcripts showed no significant effects of the starvation experiments on  
108 the normalized levels of G protein-coupled receptor encoding genes, and consequently all  
109 replicates were pooled for further analysis.

110 We mined the AKH cell specific transcriptome to identify which cohort of neuropeptide  
111 and small molecule receptors were expressed specifically in AKH cells, to offer insight into  
112 potential endocrine connections that regulate AKH cell physiology and considered these two  
113 classes of receptor molecules separately. Given that the expression profile of the entire  
114 complement of neuropeptide receptor molecules was unchanged by nutrient conditions, we pooled  
115 the sequence reads across treatment to determine relative abundance of receptor expression. We  
116 found strong expression (as defined as counts in the top third of all genes) for 13 neuropeptide  
117 receptor genes, and consistent (as defined as counts in the top two thirds of all genes) expression  
118 for an additional 12 receptor genes (**Figure 1A**). Unsurprisingly, the most abundant neuropeptide  
119 receptor in AKH cells is the AstA-R1 receptor (**Figure 1A**), which had previously been reported  
120 to be an upstream regulator of AKH release (Hentze et al., 2015). Likewise, previous publications  
121 had implicated that the peptide Myosuppressin as an inhibitor of AKH secretion in different insects

122 (Vullings et al., 1998), as well as the sNPF receptor (Oh et al., 2019). Thus, our analysis of the  
123 transcriptome shows consistency with previous behavioral results. Therefore, we focused on the  
124 relative high expression levels of the receptor that is specifically activated by the circadian  
125 hormone, PDF, as connections between the circadian system and metabolism are recognized in  
126 multiple taxa, however a connection between these two hormones have not yet been described.

127 In a set of complementary analyses, we assessed the specific expression of G protein  
128 coupled receptors that specifically bind small molecule transmitters. Interestingly, we found fairly  
129 uniform expression for nearly all the classical neurotransmitters (5HT, Octopamine, Dopamine,  
130 Acetylcholine, Tyramine, and Glutamate) (**Figure 1B**). AKH cells are known to modulate  
131 octopaminergic cells and vice versa (Yang et al., 2015, Pauls et al., 2020), and so our transcriptome  
132 verified previous experiments on AKH cell modulation. We chose to focus on dopamine receptor  
133 expression to test for potential modulation of AKH cell physiology, as many of the phenotypes  
134 associated with dopamine are similar to the starvation phenotypes that lie downstream of AKH  
135 signaling.

136 We first wanted to independently confirm that these molecules are expressed in AKH cells  
137 and employed two different methods. First, we employed single-cell RT PCR on dissected AKH  
138 cells and were able to specifically detect amplicons that corresponded to PDFR. Additionally, a  
139 PDFR driver element that has been shown to rescue relevant PDFR phenotypes (Lear et al., 2009)  
140 was used to introduce a GFP reporter to PDFR-expressing tissues. We used an AKH specific  
141 antibody (Braco et al. 2012) and found colocalization of the GFP reporter with the immunolabels  
142 (**Figure 1C**). Likewise, the DopEcR-GAL4 also showed strong expression in AKH cells.

143 ***PDFR function in AKH cells is required for normal behavioral starvation responses:***



144           After validating that AKH cells express the PDFR, we next asked whether altered PDFR  
145 expression would lead to changes in starvation sensitivity, as altered physiology of AKH cells  
146 causes a variety of starvation phenotypes (Lee et al., 2004; Isabel et al., 2004). Multiple  
147 investigations consistently have found that the loss of AKH signaling leads to increased energy  
148 stores and decreased locomotion under starvation which together result in increased survival under  
149 starvation (Lee *et al.* 2004; Isabel *et al.* 2004; Braco *et al.* 2012). We hypothesized that if the PDF  
150 receptor was functioning to modulate the release of AKH, then the loss of the receptor would lead  
151 to a change in lifespan under starvation. Using this experimental framework, we tested the AKH  
152 cell specific introduction of an RNAi element targeting PDFR significantly for altered starvation  
153 behaviors. We found that PDFR knockdown lengthened starvation lifespan (**Figure 2A**),  
154 suggesting that PDFR facilitates AKH release. One interesting feature of PDFR is that it does not  
155 show desensitization in response to ligand binding and thus, persistent presentation of PDF would  
156 lead to chronic activation (Shafer *et al.* 2008; Choi *et al.* 2009). A genetically encoded membrane-  
157 tethered PDF (tPDF) has been useful to investigate PDF gain-of-function phenotypes and does so  
158 in only cells that endogenously express the PDFR (Choi *et al.* 2009a). We found that expression  
159 of tPDF in AKH cells resulted in a short-lived phenotype (**Figure 2A**). Since PDF is a known  
160 regulator of locomotor rhythmicity (Renn et al., 1999), and that AKH cells are critical for  
161 starvation-induced hyperactivity (Lee et al., 2004; Isabel et al., 2004), we asked if there were any  
162 changes in the locomotor profiles of these manipulations. PDFR-RNAi knockdown showed  
163 slightly elevated activity under replete conditions and a wild type response to starvation (**Figure**  
164 **2B**). In contrast, expression of tPDF resulted in an abnormal locomotor pattern under both fed and  
165 starved conditions with especially high relative amounts of nighttime activity (**Figure 2B**). These  
166 results support the hypothesis that PDF facilitates AKH release, we next directly tested that

167 hypothesis by assessing functional PDF signaling in AKH cells. The PDFR has been shown to  
168 signal predominantly through the cAMP second messenger system (Mertens et al., 2005), and  
169 endogenous PDFR activation has been visualized using the epac-camps reporter (Shafer et al.,  
170 2009). Therefore, we introduced this genetically encoded cAMP reporter to AKH cells and  
171 assessed whether AKH cells were responsive to the neuropeptide PDF. We found that direct  
172 application of PDF to explanted AKH cells decreased FRET signatures of the reporter, consistent  
173 with elevated levels of cAMP (Shafer *et al.* 2008). These values were similar to the FRET changes  
174 observed with application of forskolin, a positive control that elevates cAMP levels, and notably,  
175 there was a dose dependence of PDF on changes in FRET levels (**Figure 2C**). In order to test the  
176 directness of this response, we repeated these experiments with a co-expressed PDFR-RNAi  
177 element. Knockdown of PDFR in AKH cells abolished PDF-induced responses, showing that PDF  
178 is directly acting on AKH cells, and is dependent on the specific expression of the PDF receptor.

179 ***Dopamine receptor knockdown in AKH cells exhibit starvation phenotypes:***

180 Dopamine is a biogenic amine that mediates a number of different behaviors and  
181 physiologies in *Drosophila* (Friggi-Grelin et al., 2004). We thought it was an interesting  
182 observation that all known dopamine receptors were expressed in AKH cells and given some of  
183 the parallels in phenotypes, we tested for specific AKH phenotypes (starvation and locomotor  
184 activity) in animals expressing RNAi elements specifically targeting the different dopamine  
185 receptors. We found that genetic knock down of all four dopamine receptors in AKHs cells showed  
186 a significant reduction in lifespan under starvation (**Figure 3A**). Changes in lifespan were  
187 accompanied by aberrant locomotor phenotypes under starvation. We found that manipulations in  
188 three of the four dopamine receptors (DopEcR, Dop2R, and DopR) resulted in advanced onset of  
189 hyperactivity under starvation and overall increased locomotion, whereas conversely, D2R showed

190 a significant decrease in locomotor activity (**Figure 3B**). Together these results suggest that  
191 dopamine may modulate AKH secretion, however, our results implicate multiple dopamine  
192 receptors involvement. It is also notable that one of these dopamine receptors, DopEcR has been  
193 shown to be a receptor for the steroid hormone, ecdysone, in addition to dopamine (Srivastava *et*  
194 *al.* 2005). To more fully explore the potential interaction of dopamine and ecdysone in AKH cells  
195 and to gauge the contributions of multiple dopamine receptors, we monitored explanted AKH cells  
196 expressing a calcium sensitive GFP, GCaMP6s1, in response to hormone application.

197 We next tested if dopamine was capable of effecting calcium levels in explanted AKH cells.  
198 Interestingly, we found that dopamine-induced responses were dependent on the extracellular  
199 concentration of sugar. Under high extracellular trehalose levels (15mM), dopamine application  
200 failed to produce a response, however under low extracellular trehalose levels (3mM), dopamine  
201 induced a strong peak in calcium in a dose-dependent manner (**Figure 3C**). We hypothesize that  
202 this context dependence likely reflects changes in basal receptivity of AKH cells. We, and others,  
203 have previously reported that low extracellular trehalose concentration result in AKH cell  
204 activation, however this was over a much longer time course (30 minutes), whereas peak dopamine  
205 responses occurred within 30 seconds after application. We next tested if ecdysone was capable of  
206 changing calcium concentrations and found that application of 20HE (20-hydroxyecdysone)  
207 resulted in no change in AKH cell activation. However, co-application of ecdysone and dopamine  
208 completely blocked any increase in calcium suggesting that these two hormones are acting  
209 antagonistically *in vivo* (**Figure 3C**).

## 211 **DISCUSSION**

212           In this study, we identified and characterized three hormones, (dopamine, ecdysone, and  
213 PDF) that are likely to directly regulate AKH secretion. Our initial exploration of the AKH cell  
214 transcriptome revealed the expression of a number of potential candidate GPCRs. We validated  
215 the expression of these receptors using multiple genetic and molecular methods. Next, we tested  
216 the behavioral consequences of knocking down these receptors in AKH cells and found that  
217 knockdown of each dopamine receptor produced aberrant changes in locomotion. Specifically, we  
218 found that three of the four dopamine receptors showed increase baseline locomotion as well as  
219 earlier onset of starvation induced hyperactivity. These manipulations also manifested in short  
220 lived phenotypes under starvation. We also found that changes in PDF signaling resulted in  
221 changes in both lifespan and locomotion during nutrient deprivation. These results were further  
222 supported by a functionally characterization of dopamine- and PDF-evoked responses in AKH  
223 cells using live-cell imaging. Collectively, these results clearly show that AKH cells are a critical  
224 point of integration lying at the crossroads between physiology/behavior and metabolic state of  
225 the organism.

226           Our experiments identified Pigment Dispersing Factor, PDF, as a candidate hormone that  
227 regulates AKH cell physiology. PDF is best known for its paramount role in regulating circadian  
228 rhythmicity (Renn *et al.*, 2001; Hyun *et al.* 2005; Shafer *et al.* 2008; Choi *et al.* 2009b; Peschel  
229 and Helfrich-Förster 2011). We postulated that PDF may be acting to regulate AKH cells in a  
230 circadian fashion, as recent studies have established connections between the circadian system and  
231 metabolic control (Sehgal 2016). The current model of PDF action is that of a wake- promoting  
232 hormone, secreted in the early morning, and peaking in concentration before dawn (Schneider and  
233 Stengl 2005). Based on the evidence of the PDF receptor (PDFR) being expressed in AKH cells,

234 we speculated that PDF may target AKH cells to coordinate energy release in anticipation of  
235 morning activity. Introduction of an RNAi element targeting PDFR significantly extended  
236 lifespan under starvation and in contrast, the introduction of the tethered PDF (to constitutively  
237 stimulate PDFR) decreased starvation longevity. These observations are consistent with a model  
238 in which PDF facilitates AKH release.

239         Since PDF is a responsible for the temporal regulation of locomotor activity, we next  
240 analyzed the locomotor activity under both replete and starvation conditions. Surprisingly, we  
241 found PDFR knockdown showed elevated locomotion under replete conditions and in contrast,  
242 expression of tPDF showed significantly lower basal activity that appeared unchanged during  
243 starvation. Considering that AKH is a requirement for starvation-induced hyperactivity and that it  
244 appears that AKH gain of function variants enhance locomotor activity (Isabel *et al.* 2005), these  
245 results appear to contradict the interpretation that PDF acts to increase AKH titers. Notably,  
246 animals with constitutive PDFR activation showed abnormally high levels of activity during the  
247 night and perhaps, the temporal change in activity levels reflects a chronic sleep deprivation, and  
248 this is the explanation for reduced longevity. Notably, we observed that exogenous PDF  
249 application to explanted AKH cells result in increased levels of cAMP, the second messenger  
250 downstream of PDFR and that such responses were PDFR dependent. Collectively, these results  
251 verify that PDFR is expressed in AKH cells and that PDFR action regulates AKH release.

252         Our work, as well as previous reports, suggest that AKH is dispensable for rhythmic  
253 locomotor response (Lee *et al.* 2004). Although, we cannot fully rule out the potential for PDF to  
254 modulate AKH in a circadian manner, the absence of any circadian phenotype in locomotion  
255 suggests that PDF may be acting on AKH cells in a clock-independent fashion. A major hypothesis  
256 of PDF action is that it acts to synchronize other temporal centers (Peschel and Helfrich-Förster

257 2011; Seluzicki *et al.* 2014) . However, there are groups of non-clock cells that regulate rhythmic  
258 feeding *via* PDF modulation (Cavey *et al.* 2016). and other investigations suggest that PDF may  
259 have non-clock functions. Specifically, manipulations of PDF signaling alters triglyceride levels  
260 independent of clock function (DiAngelo *et al.* 2011). Given that the circadian loci of PDF action  
261 has been mapped to a group of central neurons (Shafer *et al.* 2009), it seems unlikely that central  
262 PDF neurons are impacting AKH cells. In addition to central expression, PDF is also expressed in  
263 a subset of neurons in the ventral nerve cord (VNC) that project posteriorly to the midgut (Talsma  
264 *et al.* 2012) . These PDF neurons do not express any clock genes and are dispensable for circadian  
265 rhythmicity. Furthermore, these same neurons have been shown to impact ureter contractions in  
266 the midgut and osmotic homeostasis (Talsma *et al.* 2012). It is possible that these PDF neurons  
267 may provide the hormone source that is upstream of AKH. PDFR is also known to respond to  
268 another ligand DH31, although comparatively with lower affinity (Johnson *et al.* 2005; Mertens *et*  
269 *al.* 2005). DH31 is a multifunctional hormone that has been linked to stress response behaviors as  
270 well as circadian rhythms (Kunst *et al.* 2014). Unlike PDF, DH31 is expressed in many tissues,  
271 including enteroendocrine cells in the gut (Park *et al.* 2011) and therefore, may be more abundant  
272 in circulating hemolymph than PDF. Consequently, it may be that DH31 signaling via PDFR that  
273 is biologically relevant to AKH cells. While the precise mechanism for PDFR activation in AKH  
274 cells remains unclear and likely to be the subject of future studies, our results firmly cement that  
275 PDFR modulates this metabolic center.

276 Previous literature has found that dopamine is involved in a number of different behaviors  
277 and physiologies including courtship, memory formation, and circadian rhythms (Lebestky *et al.*  
278 2009; Keleman *et al.* 2012; Linford *et al.* 2015b). Interestingly, functional characterization of  
279 dopamine signaling illustrates numerous parallels with AKH signaling. Specifically,

280 pharmacological and genetic manipulations, intended to elevate dopamine signaling, cause  
281 increased locomotor activity and enhanced gustatory perception of sugar (Kume *et al.* 2005;  
282 Inagaki *et al.* 2012; Yamamoto and Seto 2014). Dopamine levels also rise in response to multiple  
283 forms of stress including oxidative, heat shock, and starvation (Gruntenko and Rauschenbach  
284 2008).

285         These experiments also implicate ecdysone signaling as an important endocrine factor that  
286 regulates metabolic status. Either a reduction of the expression of DopEcR levels or the complete  
287 loss of the receptor both show changes in locomotion levels and starvation sensitivity. The  
288 DopEcR is an interesting GPCR as it also binds the lipid-soluble steroid, ecdysone (Srivastava *et*  
289 *al.* 2005). Specifically, ecdysone has been shown to abolish dopamine-induced responses  
290 (Srivastava *et al.* 2005) and is thought to change the signaling parameters of the receptor (Evans  
291 *et al.* 2014). While ecdysone signaling is well-known for its impact in mediating developmental  
292 transitions, studies have shown ecdysone signaling to be a critical mediator of stress responses in  
293 adult insects (Simon *et al.* 2003; Terashima *et al.* 2005).

294         Like dopamine and AKH, ecdysone titers increase under metabolic stress (Gruntenko and  
295 Rauschenbach 2008). Furthermore, increased ecdysone halts oogenesis in females and  
296 consequently, shifts nutrient allocation from reproduction to survival (Terashima *et al.* 2005).  
297 From this evidence we hypothesized that ecdysone may abolish the inhibitory effects of dopamine  
298 on AKH cells and directly tested for interactions of these two hormones. We found that  
299 administration of dopamine under high extracellular trehalose failed to induce any change in  
300 GCaMP fluorescence. However, we did find that when extracellular trehalose was low, dopamine  
301 induced a strong increase in fluorescence. Furthermore, co-application of 20E eliminated any  
302 dopamine response under these nutrient levels. Ecdysone is thought to act by directly modulating

303 DopEcR activity, in our experiment the entirety of the dopamine-induced response was abolished  
304 by ecdysone even though other dopamine receptors are present in AKH cells. One potential  
305 hypothesis is that the other dopamine receptors signal through different mechanisms so that the  
306 calcium influx is primarily downstream of the DopEcR. Consistent with that hypothesis, the  
307 DopEcR is the most abundantly expressed dopamine receptor according to our transcriptome  
308 dataset. Also it has been previously suggested that ecdysone doesn't inhibit dopamine signaling  
309 *per se*, but rather changes the second messenger that is downstream of receptor activation (Evans  
310 et al., 2014) and our observations would be consistent with that model of DopEcR activation. One  
311 other potential mechanism that can explain these results, is that the other dopamine receptors may  
312 act to modulate DopEcR signaling to precisely regulate AKH cell responsiveness to these different  
313 ligands (dopamine or ecdysone). Future experiments aimed at identifying the roles of these  
314 molecules are required, as our results clearly demonstrate that dopamine and ecdysone are acting  
315 antagonistically on AKH cells.

316 While all of our independent experiments firmly establish a role for dopamine and  
317 ecdysone impacting AKH signaling, how do we reconcile the different results suggesting that  
318 dopamine may inhibit or enhance AKH signaling? One hypothesis is that dopamine may act as a  
319 neuromodulator, and the idea that dopamine must either be an excitatory or an inhibitory input is  
320 likely too simplistic. That idea is supported by the observation that multiple dopamine receptor  
321 subtypes are present in AKH cells, and that dopamine responsiveness of AKH cells is dependent  
322 on extracellular sugar levels. Furthermore, interpretation of our behavioral experiments center on  
323 animals expressing lifelong genetic constructs which may not be readily comparable to  
324 interpretations of dopamine action on AKH cell physiology observed along much shorter  
325 timescales. Given the contextual dependence of dopamine signaling, we submit that loss of



326 dopamine receptor signaling phenotypes may not simply distill into a model in which dopamine  
327 inhibits AKH secretion. Further complicating our understanding of the behavioral phenotypes is  
328 the fact that both dopamine and ecdysone rise in response to stress *in vivo*. Our results suggest that  
329 these two hormones are acting antagonistically to regulate AKH indicating that the pertinent  
330 information is in the ratio of these two hormones. Consequently, the net contribution of this  
331 receptor to AKH cells is reliant on the precise stoichiometry of these two molecules at a given  
332 time. Furthermore, the temporal dynamics of both dopamine and ecdysone increases are unclear  
333 and it may be that the relevant information is when during stress these hormones are released as  
334 well as absolute abundance.

335         These results demonstrate that AKH cells are regulated by multiple hormones. While the  
336 predicted phenotypic outcome proved more complex than initially hypothesized it is clear that  
337 dopamine, ecdysone, and PDF are all capable of directly acting on AKH cells. Furthermore, our  
338 results suggest that these signals are interacting in a complex context-specific manner. This study  
339 serves as an experimental foundation to further unravel the mechanisms underlying AKH cell  
340 physiology and the endocrine circuits that modulate metabolism and maintain energetic  
341 homeostasis.

342

343

## 344 **MATERIAL AND METHODS**

### 345 **Fly husbandry**

346 All flies were maintained in an incubator maintained at 25° and under a 12:12 light/dark  
347 (LD) cycle unless otherwise stated. Flies were cultured on a standard molasses–malt–cornmeal–  
348 agar–yeast medium and housed in uncrowded conditions (Zhao et al., 2010). We used the  
349 following fly strains: PDF-GAL4 (Renn et al., 2004)(BL-6869), AKH-GAL4 (Lee et al., 2004)  
350 (BL-25684),UAS-tPDF (Choi et al.,2009), PDFR-GAL4 (Lear et al., 2004) (BL-30370), UAS-  
351 epac-camps (Shafer et al., 2008)(BL-25407), UAS-mCD8-GFP (BL-5137), UAS-PDFR-RNAi  
352 (BL-38347), UAS-DopEcR-RNAi (BL-31981), UAS-Dop2R-RNAi ( BL-51423), UAS-D2R-  
353 RNAi (BL-50621), UAS-DopR-RNAi (BL-55239), UAS-GCaMP6s1 (BL-42746).

354

### 355 **AKH cell specific Transcriptome**

356 AKH cells expressing GFP under the AKH promoter were microdissected and aspirated  
357 into a glass pipette, which was placed in a PCR tube and flash frozen in an ethanol-dry ice bath.  
358 The tubes were stored at -80 for no longer than three weeks while 10 samples were prepared from  
359 5 fed and 5 starved flies. On the day of RNA amplification, the contents of the PCR tubes were  
360 centrifuged and the RNA from these samples was amplified in parallel with the Arcturus RiboAmp  
361 HS PLUS Kit by following the manufacturers protocol (KIT0505, Thermo Fisher Scientific). RNA  
362 libraries were then prepared using the Kapa Stranded mRNA-Seq library prep kit and 50 bp single  
363 end sequencing was performed on an Illumina HiSeq 4000 at Duke Center for Genomic and  
364 Computational Biology (Durham, NC). This data is available at the NCBI Sequence Read Archive  
365 under project number PRJNA642982.

366           The raw reads were filtered using Trimmomatic v0.36 to remove Illumina adaptors,  
367 leading or trailing bases below a quality score of 3, 4-base sliding window average quality below  
368 15 and reads less than 36 bp long. Filtered reads were aligned to *Drosophila melanogaster*  
369 genome BDGP6.22 using star v2.5 (Dobin et al., 2013) and a count table generated from  
370 coordinate sorted BAM files using summarizeOverlaps from the bioconductor package  
371 GenomicAlignments (Lawrence et al., 2013). We identified genes differentially expressed by  
372 starvation using the Bioconductor package DESeq2 (Love et al., 2014), but no GPCRs were  
373 differentially expressed under starvation conditions (adjusted  $p > 0.05$ ). The source code for this  
374 analysis is available at github (Saunders, 2020).

375

#### 376 **Individual locomotion/starvation**

377           Three to five-day old males were sorted 12-24 hours prior to the start of the assay. At ZT0  
378 individual male flies were loaded into 5 x 65 mm Polycarbonate Plastic tubes capped at one end  
379 with a ½ inch piece of yarn. Once loaded, a 200 µL pipette tip filled with standard *Drosophila*  
380 media and sealed at one end was placed on the end of the plastic tube. Tubes were then loaded into  
381 TriKentics DAM 2 monitor for 3 days of entrainment on replete media. Total beam counts were  
382 monitored continuously through an automated system for the duration of the experiment at 10-  
383 minute intervals. At ZT0 on the third day data collection was paused and media containing pipette  
384 tips were replaced with a tip containing a 2% agar water solution. Locomotion was monitored for  
385 at least three days or until all flies in starvation had ceased moving for 12 hours. Following the  
386 experiment, beam breaks were binned into 1 hour intervals and used for locomotor analysis. Day  
387 1 data was considered a recovery and acclimation period and was removed from analysis. Death  
388 was approximated as the time point following the last registered beam break.

389

### 390 **Live cell imaging**

391 For live cell imaging experiments, adult ring glands were dissected and placed in AHL  
392 (adult hemolymph-like) (Feng *et al.*, 2004) solution containing 12mM trehalose and 3Mm sucrose  
393 or 3mM trehalose 12mM sucrose (when stated). Dissections where then placed on a plastic cover  
394 slip containing 180  $\mu$ L of AHL. Explanted ring glands were then viewed on a Zeiss LSM 710  
395 confocal microscope and visually inspected for damage prior to imaging. All imaging settings were  
396 kept constant between experiments.

397 For calcium imaging a 20x 0.8 NA objective and a 488nm laser were used. Z stacks were  
398 collected in 10 second intervals. Cells were imaged for 1 minute prior to treatment. After imaging  
399 Z stacks were collapsed to maximum intensity projections. A region of interest was manually  
400 drawn for each ring gland and total values for pixel intensity were assessed. Values were exported  
401 in Excel and normalized to the time point immediately prior to application. Dopamine was  
402 prepared in 10% PBS AHL solution. A Kruskal Wallis ANOVA was used for analysis and no  
403 fewer than 5 replicates were tested per condition.

404 For cAMP imaging, a 40X 0.95NA objective was used. CFP was excited using a 440nm  
405 laser. Z stacks were collected in 10 second intervals and imaged for 1 minute prior to treatment.  
406 After imaging, Z stacks were collapsed to maximum intensity projections. A region of interest was  
407 manually drawn for each ring gland and total values for pixel intensity were assessed. Values were  
408 exported in Excel and adjusted for spillover (SO). Spillover was calculated using CFP expressing  
409 HEK cells under the same conditions previously described and found to be 54%. Fret ratio was  
410 calculated  $\Delta Fret = \frac{YFP - (CFP * SO)}{CFP}$  (Shafer *et al.* 2008). Data was normalized to the time point

411 immediately prior to application and Friedman's test was used to determine significance. No fewer  
412 than 3 replicates per condition were tested.

### 413 **Immunostaining**

414 All tissues dissections for immunostaining were done in 1X PBS Tx under a standard  
415 dissecting microscope. Tissue was then placed immediately into fixative (4% Paraformaldehyde  
416 7% picric acid) for 1 hour at room temperature. Tissue was then washed 10X with 1X PBS Tx  
417 before blocking with (%) BSA 1X PBS Tx solution for one hour at room temperature. Next tissue  
418 was placed in 1:1000  $\alpha$ AKH for 1 hour at room temperature and then washed 10X before moving  
419 the tissue to 1:1000 Anti Rabbit Cy3 for 2 hours at room temperature. Tissue was next washed and  
420 placed into a drop of glycerol to dehydrate it. Finally, the glycerol was removed by a kimiwipe  
421 (wicking) and replaced with Anti Fade mounting media. All images were taken on a Zeiss 710  
422 confocal microscope.

423

### 424 **Acknowledgements:**

425 This work was supported by NSF IOS1355097 and a Center for Molecular Signaling grant to ECJ.  
426 We thank the Bloomington Stock Center NS Dr. Michael Nitabach for fly stocks and acknowledge  
427 the Distributed Environment for Academic Computing (DEAC) at Wake Forest University for  
428 providing HPC resources that have contributed to the research results reported within this paper.  
429 URL: <https://is.wfu.edu/deac>

430 **REFERENCES**

- 431
- 432 Bharucha, K. N., P. Tarr, and S. L. Zipursky, 2008 A glucagon-like endocrine pathway in  
433 *Drosophila* modulates both lipid and carbohydrate homeostasis. *J. Exp. Biol.* 211: 3103–10.
- 434 Birse, R. T., J. A. E. Söderberg, J. Luo, Å. M. E. Winther, and D. R. Nässel, 2011 Regulation of  
435 insulin-producing cells in the adult *Drosophila* brain via the tachykinin peptide receptor DTKR. *J.*  
436 *Exp. Biol.* 214:.
- 437 Braco, J. T., E. L. Gillespie, G. E. Alberto, J. E. Brenman, E. C. Johnson *et al.*, 2012 Energy-  
438 dependent modulation of glucagon-like signaling in *Drosophila* via the AMP-activated protein  
439 kinase. *Genetics* 192: 457–66.
- 440 Brown, M. R., and A. O. Lea, 1988 FMRamide- and adipokinetic hormone-like immunoreactivity  
441 in the nervous system of the mosquito, *Aedes aegypti*. *J. Comp. Neurol.* 270: 606–614.
- 442 Cavey, M., B. Collins, C. Bertet, and J. Blau, 2016 Circadian rhythms in neuronal activity  
443 propagate through output circuits. *Nat. Neurosci.* 19: 587–595.
- 444 Choi, C., J.-P. Fortin, E. v. McCarthy, L. Oksman, A. S. Kopin *et al.*, 2009 Cellular Dissection of  
445 Circadian Peptide Signals with Genetically Encoded Membrane-Tethered Ligands. *Curr. Biol.* 19:  
446 1167–1175.
- 447 DiAngelo, J. R., R. Erion, A. Crocker, A. Sehgal, C. Stein *et al.*, 2011 The Central Clock Neurons  
448 Regulate Lipid Storage in *Drosophila* (S. E. Dryer, Ed.). *PLoS One* 6: e19921.
- 449 Dobin, A., Davis, C. A., Schlesinger, F., Drenkow, J., Zaleski, C., Jha, S., et al. (2013). STAR:  
450 ultrafast universal RNA-seq aligner. *Bioinformatics* 29, 15–21.  
451 doi:10.1093/bioinformatics/bts635.
- 452 Evans, P. D., A. Bayliss, and V. Reale, 2014 GPCR-mediated rapid, non-genomic actions of  
453 steroids: Comparisons between DmDopEcR and GPER1 (GPR30). *Gen. Comp. Endocrinol.* 195:  
454 157–163.
- 455 Feng Y, Ueda A, Wu CF. A modified minimal hemolymph-like solution, HL3.1, for physiological  
456 recordings at the neuromuscular junctions of normal and mutant *Drosophila* larvae. *J Neurogenet.*  
457 2004;18(2):377-402
- 458 Friggi-Grelin F, Coulom H, Meller M, Gomez D, Hirsh J, Birman S. Targeted gene expression in  
459 *Drosophila* dopaminergic cells using regulatory sequences from tyrosine hydroxylase. *J Neurobiol.*  
460 2003;54(4):618-627.

- 461 Gáliková, M., M. Diesner, P. Klepsatel, P. Hehlert, Y. Xu *et al.*, 2015 Energy Homeostasis Control  
462 in *Drosophila* Adipokinetic Hormone Mutants. *Genetics* 201: 665–83.
- 463 Grönke, S., G. Müller, J. Hirsch, S. Fellert, A. Andreou *et al.*, 2007 Dual Lipolytic Control of  
464 Body Fat Storage and Mobilization in *Drosophila* (S. O’Rahilly, Ed.). *PLoS Biol.* 5: e137.
- 465 Gruntenko, N. E., and I. Y. Rauschenbach, 2008 Interplay of JH, 20E and biogenic amines under  
466 normal and stress conditions and its effect on reproduction. *J. Insect Physiol.* 54: 902–908.
- 467 Hentze JL, Carlsson MA, Kondo S, Nässel DR, Rewitz KF. The Neuropeptide Allatostatin A  
468 Regulates Metabolism and Feeding Decisions in *Drosophila*. *Sci Rep.* 2015;5:11680. Published  
469 2015 Jun 30. doi:10.1038/srep11680
- 470 Hyun, S., Y. Lee, S.-T. Hong, S. Bang, D. Paik *et al.*, 2005 *Drosophila* GPCR Han Is a Receptor  
471 for the Circadian Clock Neuropeptide PDF. *Neuron* 48: 267–278.
- 472 Inagaki, H. K., S. Ben-Tabou de-Leon, A. M. Wong, S. Jagadish, H. Ishimoto *et al.*, 2012  
473 Visualizing neuromodulation in vivo: TANGO-mapping of dopamine signaling reveals appetite  
474 control of sugar sensing. *Cell* 148: 583–95.
- 475 Isabel, G., J.-R. Martin, S. Chidami, J. A. Veenstra, and P. Rosay, 2005 AKH-producing  
476 neuroendocrine cell ablation decreases trehalose and induces behavioral changes in *Drosophila*.  
477 *Am. J. Physiol. Regul. Integr. Comp. Physiol.* 288: R531-8.
- 478 Johnson, E. C. (2017). “Stressed-out insects II. Physiology, behavior and neuroendocrine circuits  
479 mediating stress responses.” in *Hormones, Brain and Behavior*. (Academic Press).
- 480 Kannan, K., and Y.-W. C. Fridell, 2013 Functional implications of *Drosophila* insulin-like peptides  
481 in metabolism, aging, and dietary restriction. *Front. Physiol.* 4:.
- 482 Keleman, K., E. Vrontou, S. Krüttner, J. Y. Yu, A. Kurtovic-Kozaric *et al.*, 2012 Dopamine  
483 neurons modulate pheromone responses in *Drosophila* courtship learning. *Nature* 489: 145–9.
- 484 Kim, S. K., and E. J. Rulifson, 2004 Conserved mechanisms of glucose sensing and regulation by  
485 *Drosophila corpora cardiaca* cells. *Nature* 431: 316–320.
- 486 Kume, K., S. Kume, S. K. Park, J. Hirsh, and F. R. Jackson, 2005 Dopamine Is a Regulator of  
487 Arousal in the Fruit Fly. *J. Neurosci.* 25: 7377–7384.
- 488 Kunst, M., M. E. Hughes, D. Raccuglia, M. Felix, M. Li *et al.*, 2014 Calcitonin Gene-Related  
489 Peptide Neurons Mediate Sleep-Specific Circadian Output in *Drosophila*. *Curr. Biol.* 24: 2652–  
490 2664.

- 491 Lawrence, M., Huber, W., Pagès, H., Aboyoun, P., Carlson, M., Gentleman, R., et al. (2013).  
492 Software for Computing and Annotating Genomic Ranges. *PLOS Computational Biology* 9,  
493 e1003118. doi:10.1371/journal.pcbi.1003118.
- 494 Lear, B. C., L. Zhang, and R. Allada, 2009 The neuropeptide PDF acts directly on evening  
495 pacemaker neurons to regulate multiple features of circadian behavior. *PLoS Biol.* 7: e1000154.
- 496 Lebestky, T., J.-S. C. Chang, H. Dankert, L. Zelnik, Y.-C. Kim *et al.*, 2009 Two different forms  
497 of arousal in *Drosophila* are oppositely regulated by the dopamine D1 receptor ortholog DopR via  
498 distinct neural circuits. *Neuron* 64: 522–36.
- 499 Lee, G., J. H. Park, S. K. Aggarwal, R. C. King, W. An *et al.*, 2004 Hemolymph sugar homeostasis  
500 and starvation-induced hyperactivity affected by genetic manipulations of the adipokinetic  
501 hormone-encoding gene in *Drosophila melanogaster*. *Genetics* 167: 311–23.
- 502 Leopold, P., and N. Perrimon, 2007 *Drosophila* and the genetics of the internal milieu. *Nature* 450:  
503 186–188.
- 504 Linford, N. J., J. Ro, B. Y. Chung, and S. D. Pletcher, 2015 Gustatory and metabolic perception  
505 of nutrient stress in *Drosophila*. *Proc. Natl. Acad. Sci. U. S. A.* 112: 2587–92.
- 506 Love, M. I., Huber, W., and Anders, S. (2014). Moderated estimation of fold change and  
507 dispersion for RNA-seq data with DESeq2. *Genome Biology* 15, 550. doi:10.1186/s13059-014-  
508 0550-8.
- 509 Mertens, I., A. Vandingenen, E. C. Johnson, O. T. Shafer, W. Li *et al.*, 2005 PDF Receptor  
510 Signaling in *Drosophila* Contributes to Both Circadian and Geotactic Behaviors. *Neuron* 48: 213–  
511 219.
- 512 Mistlberger, R. E., 2011 Neurobiology of food anticipatory circadian rhythms. *Physiol. Behav.*  
513 104: 535–545.
- 514 Oh, Y., Lai, J.S., Mills, H.J. *et al.* A glucose-sensing neuron pair regulates insulin and glucagon  
515 in *Drosophila*. *Nature* **574**, 559–564 (2019).
- 516 Pannabecker, T., and I. Orchard, 1986 Octopamine and cyclic AMP mediate release of  
517 adipokinetic hormone I and II from isolated locust neuroendocrine tissue. *Mol. Cell. Endocrinol.*  
518 48: 153–9.
- 519 Park, J.-H., J. Y. Kwon, J. Chandrashekar, M. Hoon, N. Ryba *et al.*, 2011 Heterogeneous  
520 Expression of *Drosophila* Gustatory Receptors in Enteroendocrine Cells (F. Marion-Poll, Ed.).  
521 *PLoS One* 6: e29022.
- 522 Pauls D, Selcho M, Räderscheidt J, et al. Endocrine fine-tuning of daily locomotor activity patterns  
523 under non-starving conditions in *Drosophila*. bioRxiv; 2020. DOI: 10.1101/2020.02.13.947556.



- 524 Perkins, L. A., L. Holderbaum, R. Tao, Y. Hu, R. Sopko *et al.*, 2015 The Transgenic RNAi Project  
525 at Harvard Medical School: Resources and Validation. *Genetics* 201: 843–852.
- 526 Peschel, N., and C. Helfrich-Förster, 2011 Setting the clock – by nature: Circadian rhythm in the  
527 fruitfly *Drosophila melanogaster*. *FEBS Lett.* 585: 1435–1442.
- 528 Renn SC, Park JH, Rosbash M, Hall JC, Taghert PH. A pdf neuropeptide gene mutation and  
529 ablation of PDF neurons each cause severe abnormalities of behavioral circadian rhythms in  
530 *Drosophila*. *Cell.* 1999;99(7):791-802.
- 531 Saunders, C. J. (2020). *JakeSaunders/Dmel\_AKHcell\_RNA-seq v1.0.1*. Zenodo  
532 doi:10.5281/zenodo.3924456.
- 533 Scheurink, A. J. W., G. J. Boersma, R. Nergårdh, and P. Södersten, 2010 Neurobiology of  
534 hyperactivity and reward: Agreeable restlessness in Anorexia Nervosa. *Physiol. Behav.* 100: 490–  
535 495.
- 536 Schneider, N.-L., and M. Stengl, 2005 Pigment-Dispersing Factor and GABA Synchronize Cells  
537 of the Isolated Circadian Clock of the Cockroach *Leucophaea maderae*. *J. Neurosci.* 25:.
- 538 Sehgal, A., 2016 Control of Metabolism by Central and Peripheral Clocks in *Drosophila*, pp. 33–  
539 40 in.
- 540 Seluzicki, A., M. Flourakis, E. Kula-Eversole, L. Zhang, V. Kilman *et al.*, 2014 Dual PDF  
541 signaling pathways reset clocks via TIMELESS and acutely excite target neurons to control  
542 circadian behavior. *PLoS Biol.* 12: e1001810.
- 543 Shafer, O. T., D. J. Kim, R. Dunbar-Yaffe, V. O. Nikolaev, M. J. Lohse *et al.*, 2008 Widespread  
544 receptivity to neuropeptide PDF throughout the neuronal circadian clock network of *Drosophila*  
545 revealed by real-time cyclic AMP imaging. *Neuron* 58: 223–37.
- 546 Shafer, O. T., P. H. Taghert, J. Dunlap, E. Herzog, M. Ralph *et al.*, 2009 RNA-Interference  
547 Knockdown of *Drosophila* Pigment Dispersing Factor in Neuronal Subsets: The Anatomical Basis  
548 of a Neuropeptide’s Circadian Functions (M. N. Nitabach, Ed.). *PLoS One* 4: e8298.
- 549 Simon, A. F., C. Shih, A. Mack, and S. Benzer, 2003 Steroid Control of Longevity in *Drosophila*  
550 *melanogaster*. *Science* (80- ). 299:.
- 551 Srivastava, D. P., E. J. Yu, K. Kennedy, H. Chatwin, V. Reale *et al.*, 2005 Rapid, Nongenomic  
552 Responses to Ecdysteroids and Catecholamines Mediated by a Novel *Drosophila* G-Protein-  
553 Coupled Receptor. *J. Neurosci.* 25: 6145–6155.
- 554 Stephan, D., M. Winkler, P. Kühner, U. Russ, and U. Quast, 2006 Selectivity of repaglinide and  
555 glibenclamide for the pancreatic over the cardiovascular KATP channels. *Diabetologia* 49: 2039–  
556 2048.

- 557 Talsma, A. D., C. P. Christov, A. Terriente-Felix, G. A. Linneweber, D. Perea *et al.*, 2012 Remote  
558 control of renal physiology by the intestinal neuropeptide pigment-dispersing factor in *Drosophila*.  
559 Proc. Natl. Acad. Sci. U. S. A. 109: 12177–82.
- 560 Terashima, J., K. Takaki, S. Sakurai, and M. Bownes, 2005 Nutritional status affects 20-  
561 hydroxyecdysone concentration and progression of oogenesis in *Drosophila melanogaster*. J.  
562 Endocrinol. 187: 69–79.
- 563 Toivonen, J. M., and L. Partridge, 2009 Endocrine regulation of aging and reproduction in  
564 *Drosophila*. Mol. Cell. Endocrinol. 299: 39–50.
- 565 Veelaert, D., P. Passier, B. Devreese, J. Vanden Broeck, J. Van Beeumen *et al.*, 1997 Isolation and  
566 Characterization of an Adipokinetic Hormone Release-Inducing Factor in Locusts: The Crustacean  
567 Cardioactive Peptide. Endocrinology 138: 138–142.
- 568 Vullings, H. G. B., S. E. C. G. Ten Voorde, P. C. C. M. Passier, J. H. B. Diederren, D. J. Van Der  
569 Horst *et al.*, 1998 A possible role of schistoFLRFamide in inhibition of adipokinetic hormone  
570 release from locust corpora cardiaca. J. Neurocytol. 27: 901–913.
- 571 Yamamoto, S., and E. S. Seto, 2014 Dopamine dynamics and signaling in *Drosophila*: an overview  
572 of genes, drugs and behavioral paradigms. Exp. Anim. 63: 107–19.
- 573 Yang, Z., Y. Yu, V. Zhang, Y. Tian, W. Qi *et al.*, 2015 Octopamine mediates starvation-induced  
574 hyperactivity in adult *Drosophila*. Proc. Natl. Acad. Sci. 112: 5219–5224.
- 575 Yu, Y., R. Huang, J. Ye, V. Zhang, C. Wu *et al.*, 2016 Regulation of starvation-induced  
576 hyperactivity by insulin and glucagon signaling in adult *Drosophila*. Elife 5: 969–978.
- 577 Zhao, Y., C. A. Bretz, S. A. Hawksworth, J. Hirsh, and E. C. Johnson, 2010 Corazonin Neurons  
578 Function in Sexually Dimorphic Circuitry That Shape Behavioral Responses to Stress in  
579 *Drosophila* (M. N. Nitabach, Ed.). PLoS One 5: e9141.
- 580
- 581

582 **FIGURE LEGENDS:**

583 **FIGURE 1. AKH cells express multiple GPCRs.** Results from the RNAsequencing of  
584 individual APCs were mined for specific expression of neuropeptide GPCRs (1A) and amine  
585 GPCRs (1B). Each gene listed was reliably expressed across samples and the reads per million  
586 mapped reads are shown here for the expressed genes. Note that the PDFR is the 4th most  
587 abundant receptor expressed in APCs, following the Ast-A receptor, the MS-receptor and the AKH  
588 receptor. In 1B we note that APCs express multiple receptors for most of the small molecule  
589 transmitters, including octopamine, dopamine and serotonin. We validated expression for the  
590 PDFR in APCs by employing a specific GAL4 element that had previously been shown to rescue  
591 PDFR- phenotypes to drive GFP and using an antibody against AKH – show co-labeling (1C top).  
592 We used a similar approach for validating the DopEcR, using a DopEcR-Gal4 element to drive  
593 GFP and counterstained with AKH antisera. (1C. bottom).

594 **Figure 2. Manipulations of PDFR result in alterations of AKH dependent phenotypes.** We  
595 genetically manipulated PDFR function in APCs and evaluated AKH related phenotypes including  
596 starvation lifespan (2A) and locomotor activity (2B and C). Figure 2A). Specifically, APC  
597 introduction of a PDFR-RNAi element lead to significantly longer mean lifespan during starvation)  
598 while introduction of a membrane-tethered PDF (t-PDF) to elicit constitutive PDFR signaling  
599 produced the opposite phenotype, specifically a significant shorter mean lifespan during starvation.  
600 (Black bars denote significant difference from controls ( $P < 0.05$  ANOVA)). Figure 2B.  
601 Locomotor plots of locomotor activity during replete (black line) and starved (red line) conditions  
602 from animals expressing a PDFR-RNAi element (top) or a t-PDF element (bottom) as compared  
603 to genetic controls (middle). Figure 2C. Comparisons of total locomotor activity across these  
604 genotypes, Black bars denote statistical significance from control lines ( $P < 0.05$  ANOVA). +  
605 denotes locomotor activity under replete conditions, and the – denotes activity during starvation.  
606 Figure 2D. Exogenous application of PDF alters the FRET signature of the epac-camps cAMP  
607 reporter. AKH cells expressing the epac-camps FRET sensor were isolated and different  
608 concentrations of PDF were applied. PDF elicited a significant change in FRET, consistent with  
609 previous demonstrations of this receptor modulating cAMP levels, and shows dose dependence.  
610 Notably, co-expression of a PDFR-RNAi element eliminates these responses. Black bars denote  
611 significant differences from vehicle addition.

612 **Figure 3. Dopamine modulates AKH dependent phenotypes.** We introduced RNAi elements  
613 targeting each of the dopamine receptor present in AKH cells and assessed starvation lifespan  
614 (Figure 3A) and locomotor activity (Figure 3B and 3C). We note that the each of the dopamine  
615 receptor RNAi elements significantly reduced lifespan during starvation (black bars denote  
616 significance  $P < 0.05$ , ANOVA). Figure 3B. Locomotor plots of locomotor activity during replete  
617 (black line) and starved (red line) conditions from animals expressing RNAi elements targeting a  
618 specified Dopamine receptor as compared to genetic controls. Figure 2C. Comparisons of total  
619 locomotor activity across these genotypes, Black bars denote statistical significance from control  
620 lines ( $P < 0.05$  ANOVA). + denotes locomotor activity under replete conditions, and the – denotes  
621 activity during starvation. Figure 2D. Exogenous application of dopamine alters GCaMP reporter  
622 fluorescence. AKH cells expressing the GCaMP sensor were isolated and different concentrations

623 of DA were applied. DA elicited a significant change in GCaMP and showed dose dependence.  
624 Notably, co-application of ecdysone eliminates these responses. Black bars denote significant  
625 differences from vehicle addition.

626

627

A

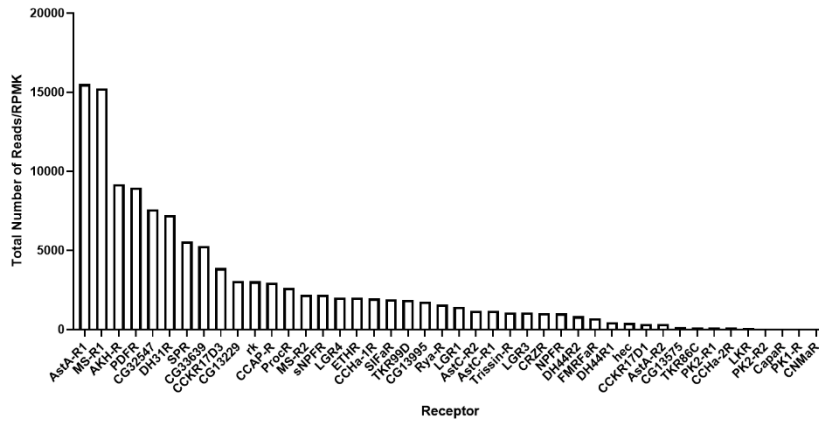

B

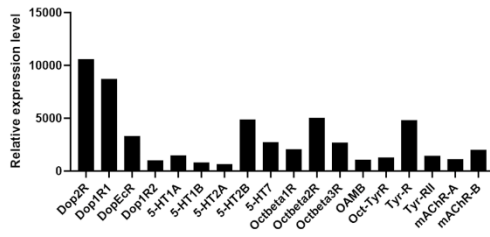

C

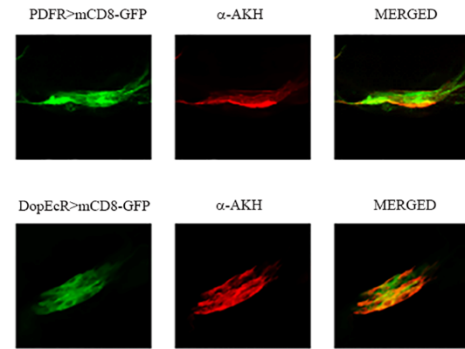

628

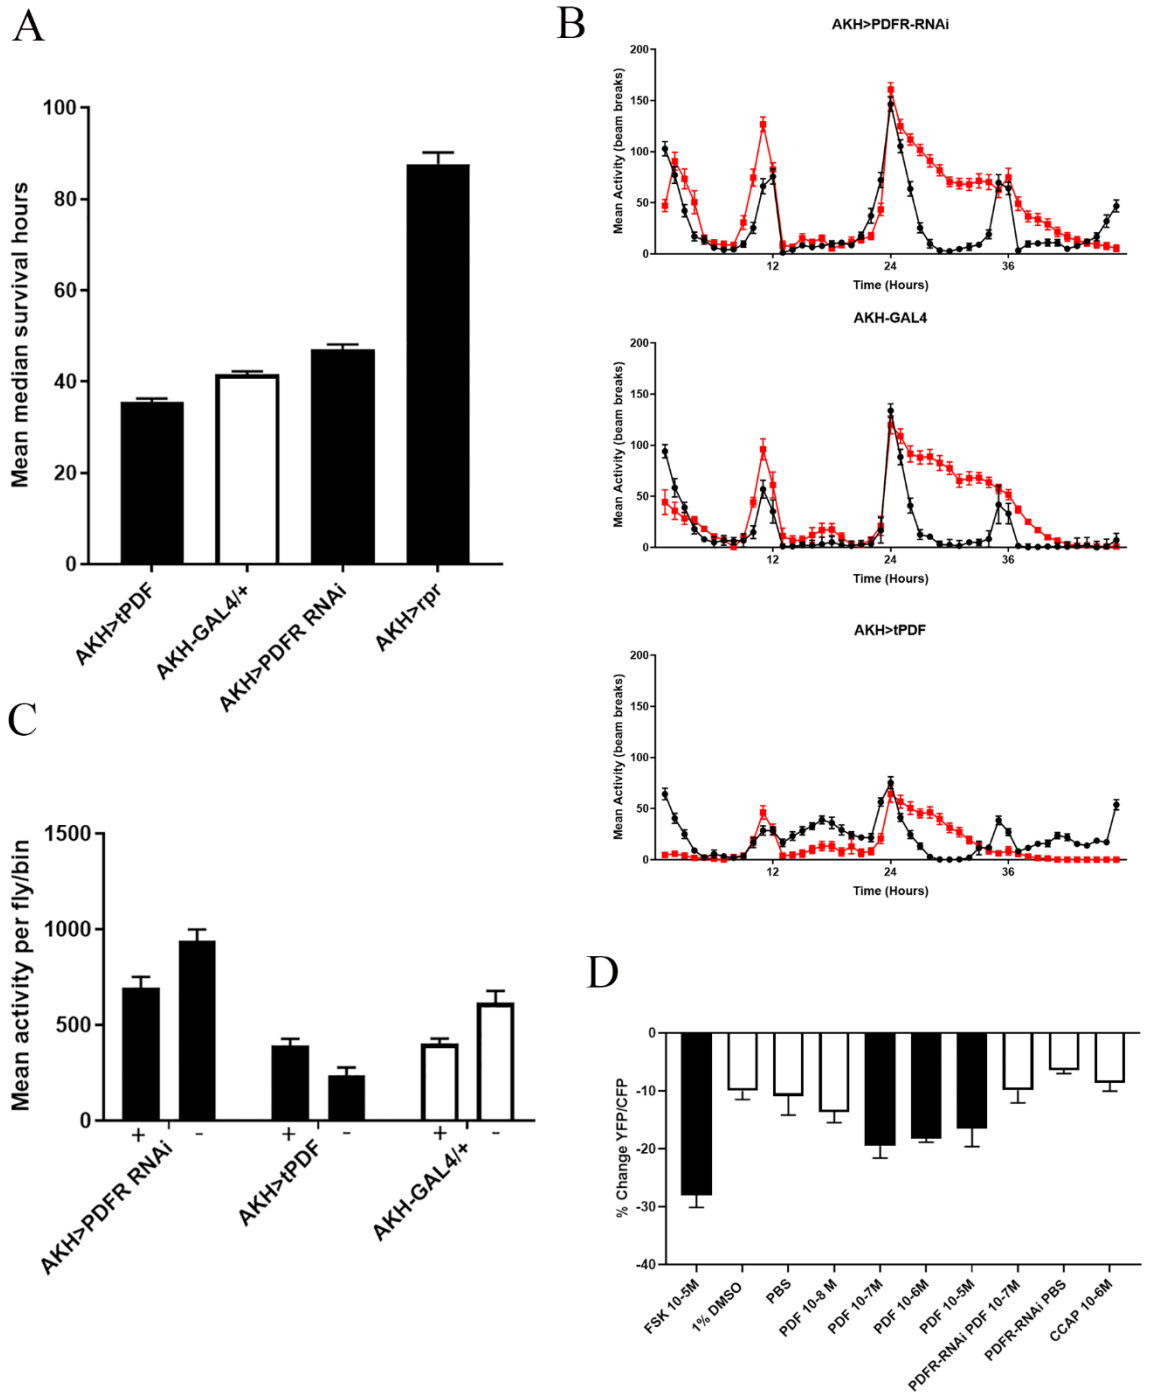

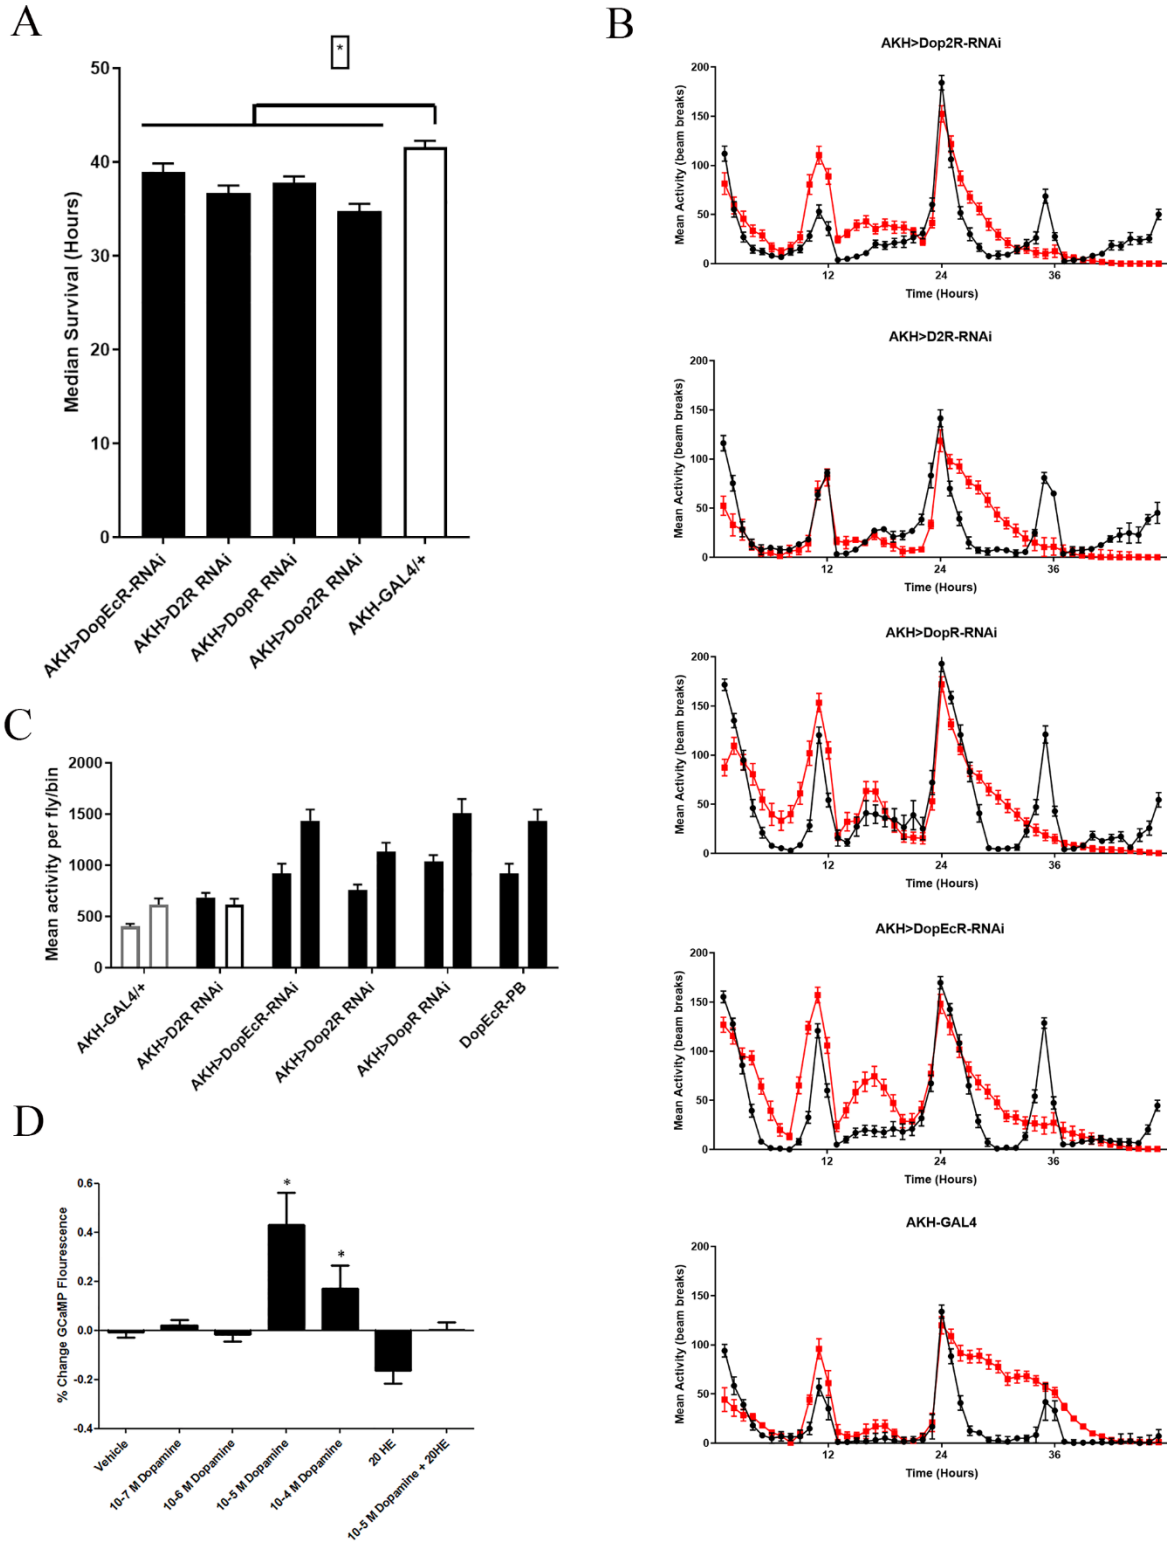

630
